# Supplementary material for: A water-soluble conjugated polyelectrolyte for selective and sensitive detection of carcinogenic chromium(vi)
Source: Royal Society of Chemistry journal article supplement (doi:10.1039/d3an01387a), 2023-01-01
Supplement: d3an01387a1.pdf [file d3an01387a1.pdf]

## **Electronic Supplementary Information**

# Water-Soluble Conjugated Polyelectrolyte for Selective and Sensitive Detection of Carcinogenic Chromium(VI)

Arvin Sain Tanwar,<sup>a,b</sup> Mst Nasima Khatun,<sup>a</sup> Moirangthem Anita Chanu,<sup>a</sup> Tapshi Sarmah,<sup>a</sup> Yeon-Ho Im,<sup>b\*</sup> and Parameswar Krishnan Iyer<sup>a,c\*</sup>

<sup>a</sup>Department of Chemistry, Indian Institute of Technology Guwahati, Guwahati 781039, India.

<sup>b</sup>School of Semiconductor and Chemical Engineering, Clean Energy Research Center, Jeonbuk National University, Jeonju, Jeonbuk 54896, Republic of Korea.

<sup>c</sup>Centre for Nanotechnology, Indian Institute of Technology Guwahati, Guwahati, 781039, India

AUTHOR EMAIL ADDRESS: [pki@iitg.ernet.in](mailto:pki@iitg.ernet.in); [yeonhoim@jbnu.ac.kr](mailto:yeonhoim@jbnu.ac.kr)

AUTHOR FAX: +91 361 258 2349

**Table S1:** A comparative study of few optical sensors recently developed for detection of Cr(VI).

| Material Used                                 | Detection Limit                                          | Sensing Mechanism                     | Quenching Constant (M <sup>-1</sup> ) | Reference        |
|-----------------------------------------------|----------------------------------------------------------|---------------------------------------|---------------------------------------|------------------|
| <i>Conjugated Polyelectrolyte (PPMI)</i>      | <i>0.85 × 10<sup>-9</sup> M (0.250 ppb)</i>              | <i>Static Quenching</i>               | <i>1.32 × 10<sup>6</sup></i>          | <i>This work</i> |
| MA-1@CNT-NB                                   | 76.9 × 10 <sup>-9</sup> M                                | IFE                                   | 1.0 × 10 <sup>5</sup>                 | 1                |
| MOF based                                     | 1 ppb in 5 to 10 min                                     | Absorbance @395 nm                    | -                                     | 2                |
| Cotton Fabric                                 | 0.029 mg/L in 30 s & 0.0013 mg/L in 5 min                | Colorimetric                          | -                                     | 3                |
| MWCNs nanozymes                               | 40 × 10 <sup>-9</sup> M                                  | Colorimetric                          | -                                     | 4                |
| Cal-CS/PEG/Ag nanohybrids                     | 79 × 10 <sup>-9</sup> M                                  | Colorimetric                          | -                                     | 5                |
| MOF                                           | 0.09 × 10 <sup>-6</sup> M                                | IFE                                   | 2.00 × 10 <sup>4</sup>                | 6                |
| nanoparticles                                 | 0.03 × 10 <sup>-6</sup> M                                | Colorimetric                          | -                                     | 7                |
| MOF                                           | 0.33 × 10 <sup>-6</sup> M                                | RET                                   | 1.32 × 10 <sup>4</sup>                | 8                |
| Polyfluorene P(Fmoc-Arg-OH) and P(Fmoc-GluOH) | 0.016 × 10 <sup>-9</sup> M and 3.33 × 10 <sup>-6</sup> M | -                                     | -                                     | 9                |
| acridine-diphenylacetyl moiety (NDA)          | 0.160 × 10 <sup>-6</sup> M                               | Complexation ("ICT OFF")              | -                                     | 10               |
| MOF                                           | 18 × 10 <sup>-9</sup> M                                  | IFE                                   | -                                     | 11               |
| MOF                                           | 20 × 10 <sup>-9</sup> M                                  | Electron transfer                     | -                                     | 12               |
| Nanocomposite                                 | 66 × 10 <sup>-9</sup> M                                  | PET                                   | 2.99 × 10 <sup>5</sup>                | 13               |
| Carbon dots-wrapped Boehmite nanoparticles    | 58 × 10 <sup>-9</sup> M                                  | PET                                   | 1.75 × 10 <sup>5</sup>                | 14               |
| CB[6]-based supramolecular assembly           | 3.9 × 10 <sup>-6</sup> M                                 | FRET                                  | 6 × 10 <sup>3</sup>                   | 15               |
| gold nanoclusters                             | 0.12 × 10 <sup>-6</sup> M                                | -                                     | 13.28 ppm <sup>-1</sup>               | 16               |
| MOF                                           | 0.41 × 10 <sup>-6</sup> M                                | Absorbance of excitation light (pIFE) | 1.38 × 10 <sup>4</sup>                | 17               |
| Non-conjugated polymer (GCPF)                 | 0.22 × 10 <sup>-6</sup> M                                | Oxidative damage to (GCPF)            | -                                     | 18               |
| nanocomposite                                 | 1 ppb                                                    | Electron transfer                     | -                                     | 19               |
| MOF                                           | -                                                        | -                                     | 9.19 × 10 <sup>5</sup>                | 20               |
| MOF                                           | 3.53 × 10 <sup>-6</sup> M                                | Electronic interactions               | 2.07 × 10 <sup>4</sup>                | 21               |

**Table S2:** Fluorescence lifetime decay of each component and their fractions of PPMI in presence of different amounts of Cr(VI).

| Sample                          | $\tau_1$<br>(ns) | %     | $\tau_2$<br>(ns) | %     | $\tau_3$<br>(ns) | %     | $\chi^2$ | $\tau_{avg}$<br>(ns) |
|---------------------------------|------------------|-------|------------------|-------|------------------|-------|----------|----------------------|
| PPMI                            | 1.208            | 52.58 | 4.025            | 47.41 | -                | -     | 0.944    | 2.54                 |
| PPMI + Cr(VI)<br>(3.33 $\mu$ M) | 0.570            | 24.08 | 1.914            | 37.94 | 5.093            | 37.97 | 1.016    | 2.79                 |
| PPMI + Cr(VI)<br>(6.66 $\mu$ M) | 0.560            | 6.93  | 1.791            | 40.24 | 5.158            | 52.81 | 1.073    | 3.48                 |
| PPMI + Cr(VI)<br>(10.0 $\mu$ M) | 0.272            | 16.42 | 1.582            | 37.66 | 5.186            | 45.91 | 1.017    | 3.02                 |

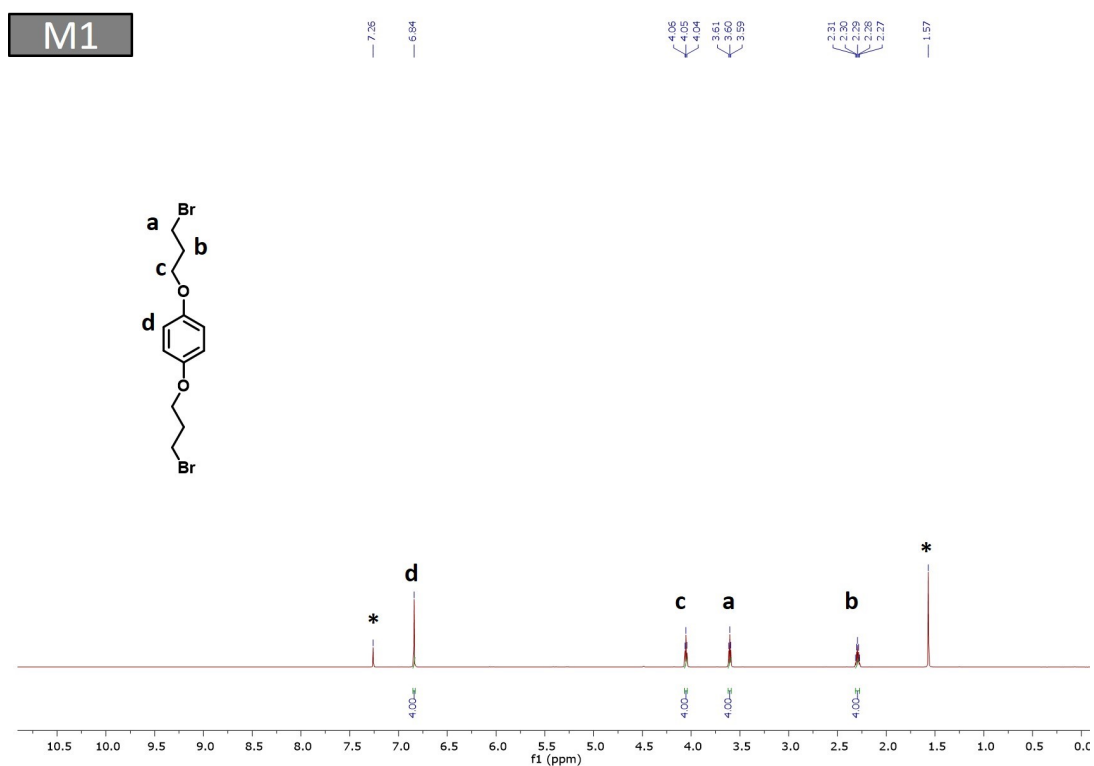

**Fig. S1**  $^1\text{H}$  NMR spectra of M1.

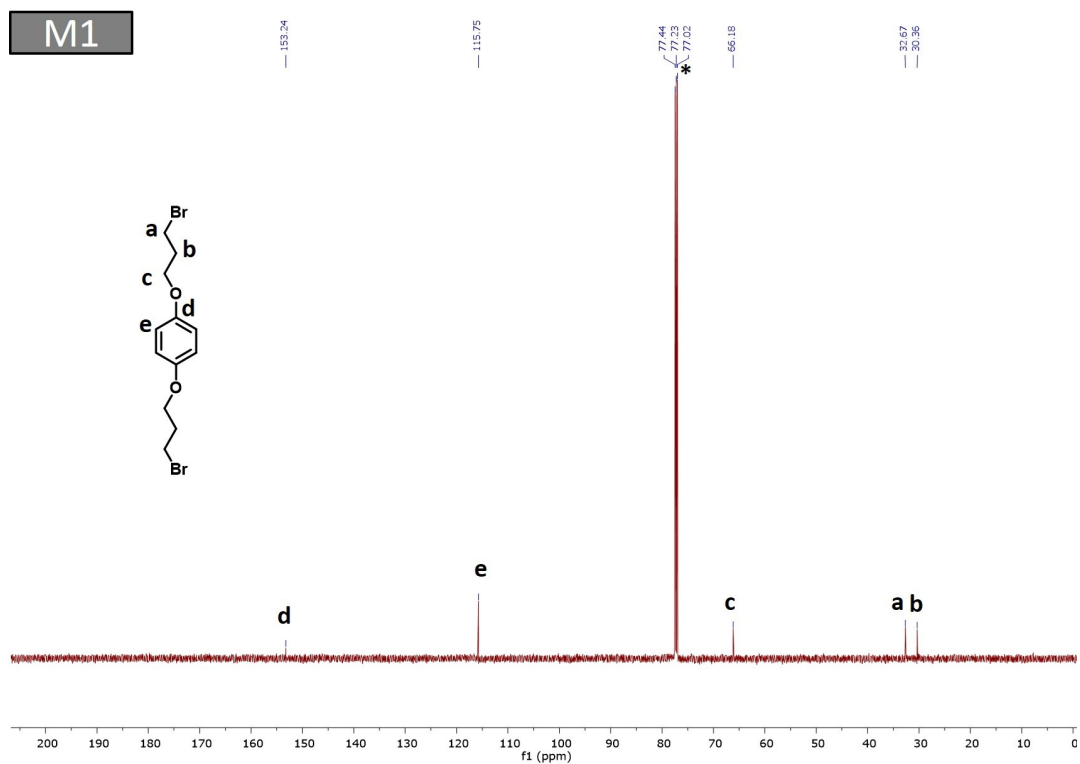

**Fig. S2**  $^{13}\text{C}$  NMR spectra of M1.

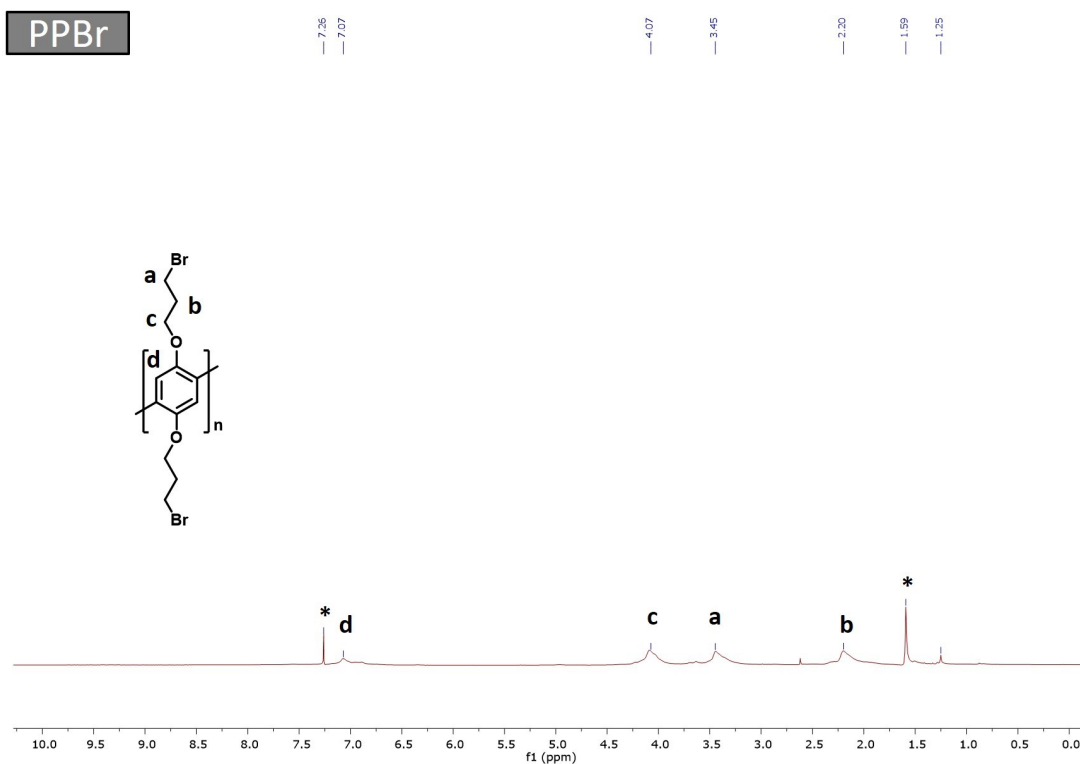

**Fig. S3**  $^1\text{H}$  NMR spectra of PPBr.

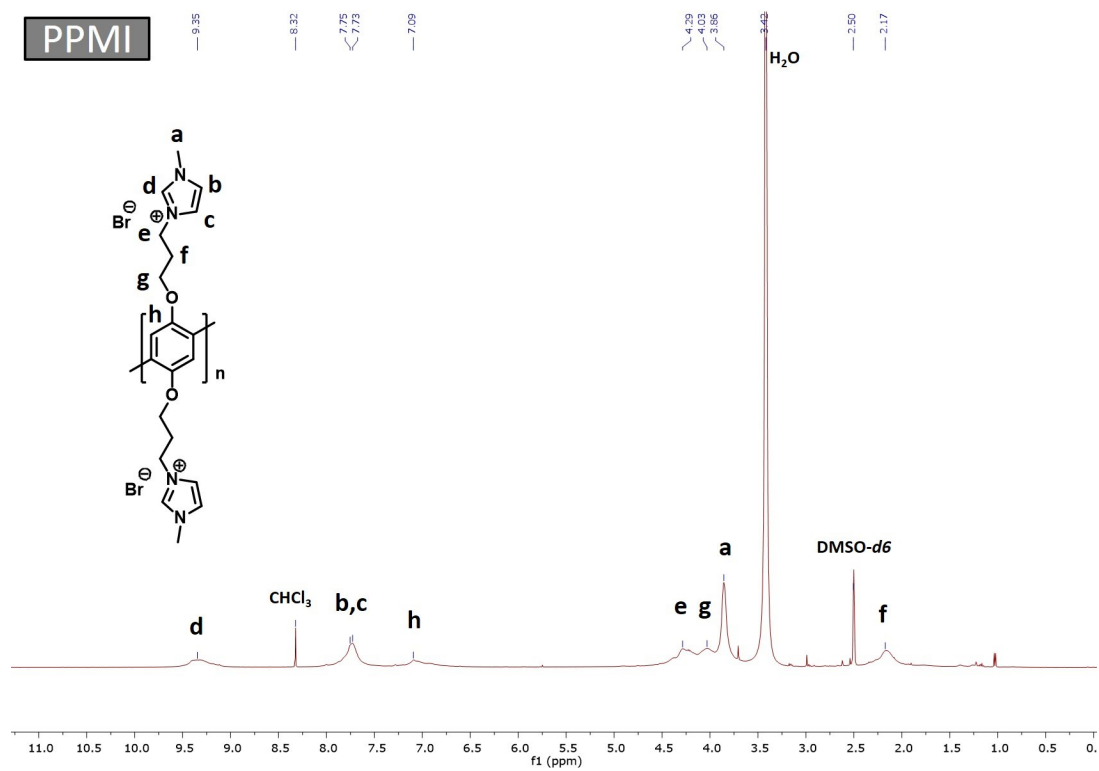

**Fig. S4** <sup>1</sup>H NMR spectra of PPMI.

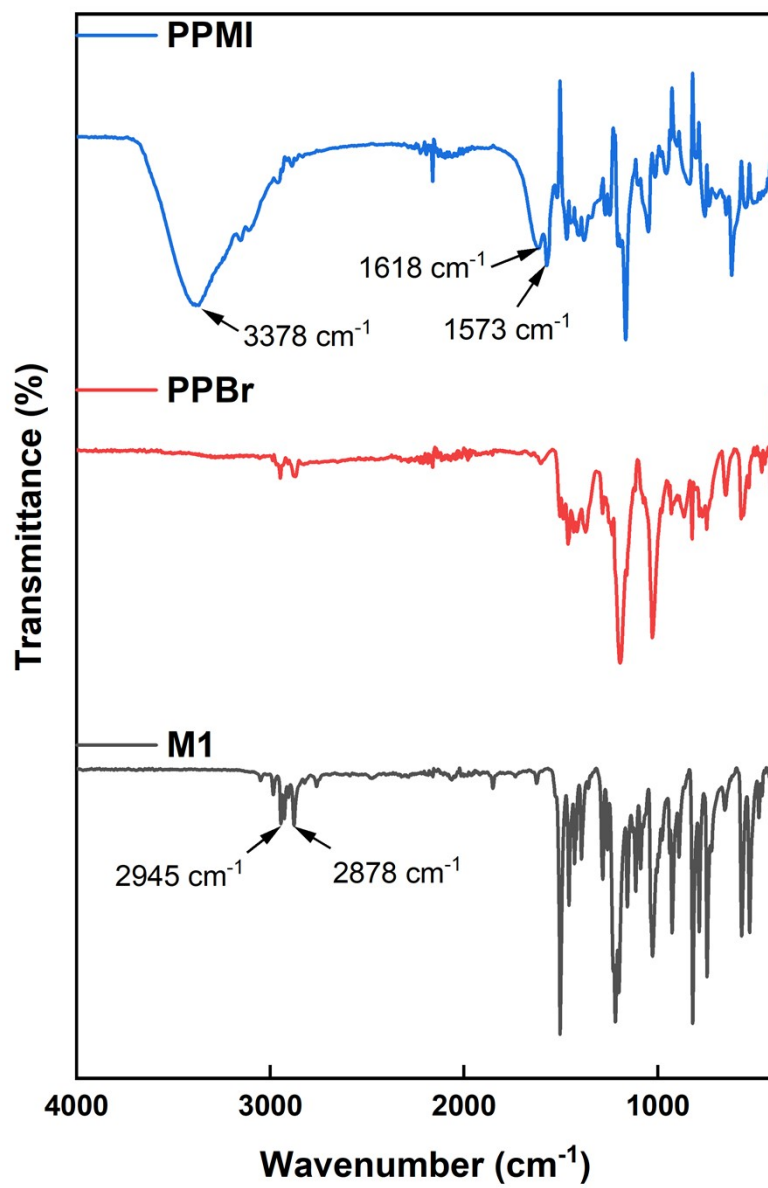

**Fig. S5** FTIR spectra of M1, PPBr and PPMI.

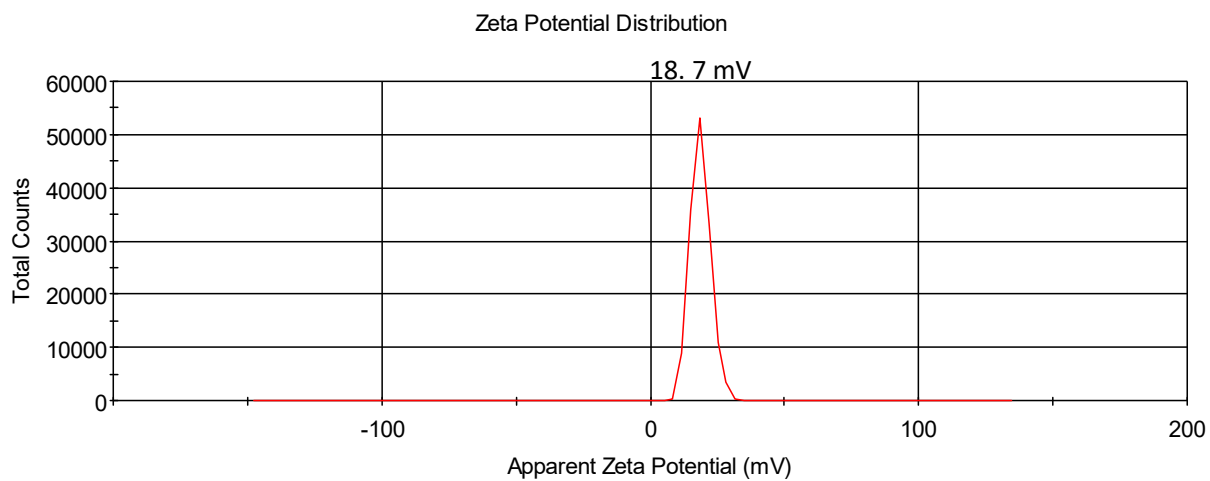

**Fig. S6.** Zeta potential of PPMI.

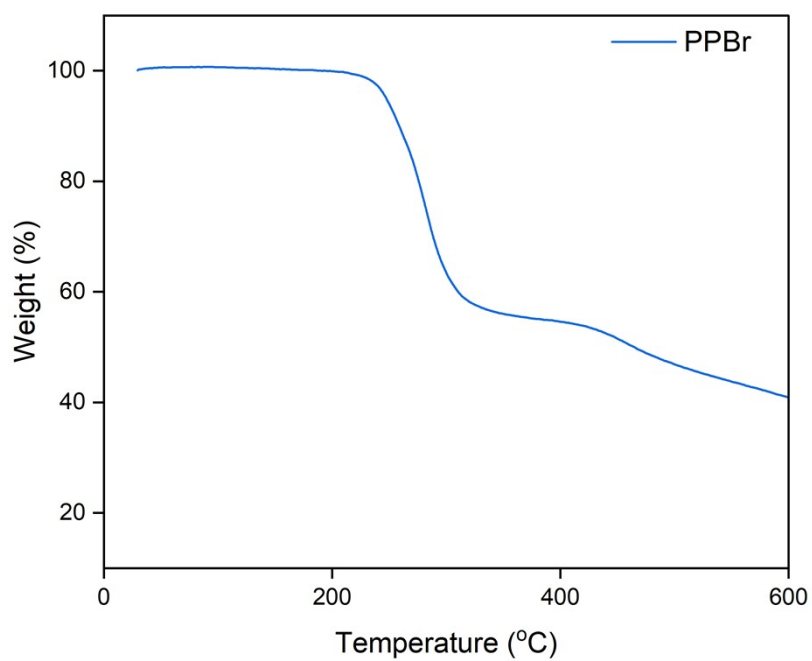

**Fig. S7.** TGA of PPBr (~2.1 mg, 10°C/min, 0-600 °C).

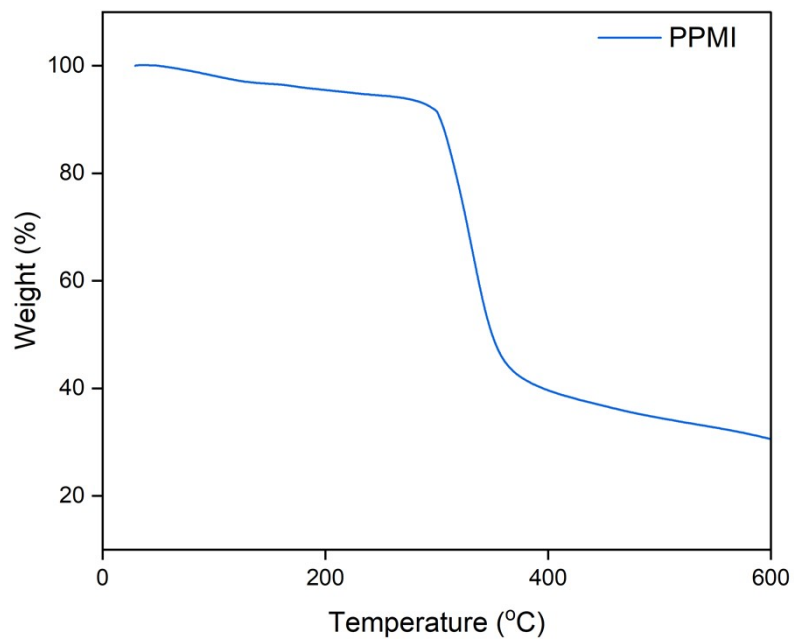

**Fig. S8.** TGA of PPMI (~3.9 mg, 10°C/min, 0-600 °C).

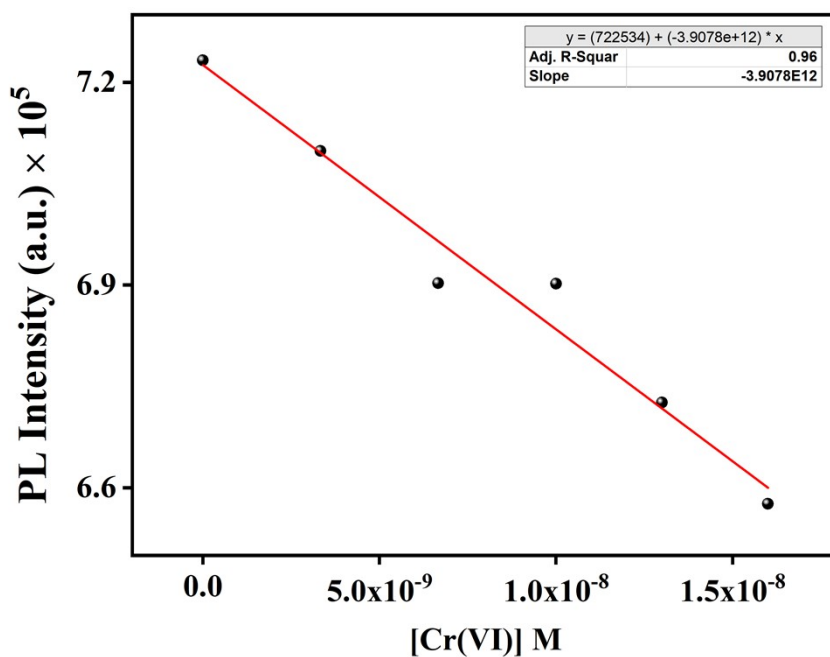

**Fig. S9** Fluorescence intensity of PPMI vs Cr(VI) concentration.

$$\text{LOD} = 3 \times \text{S.D.}/k$$

$$\text{LOD} = 3 \times 1113.56 / (3.91 \times 10^{12})$$

$$\text{LOD} = 0.85 \text{ nM}$$



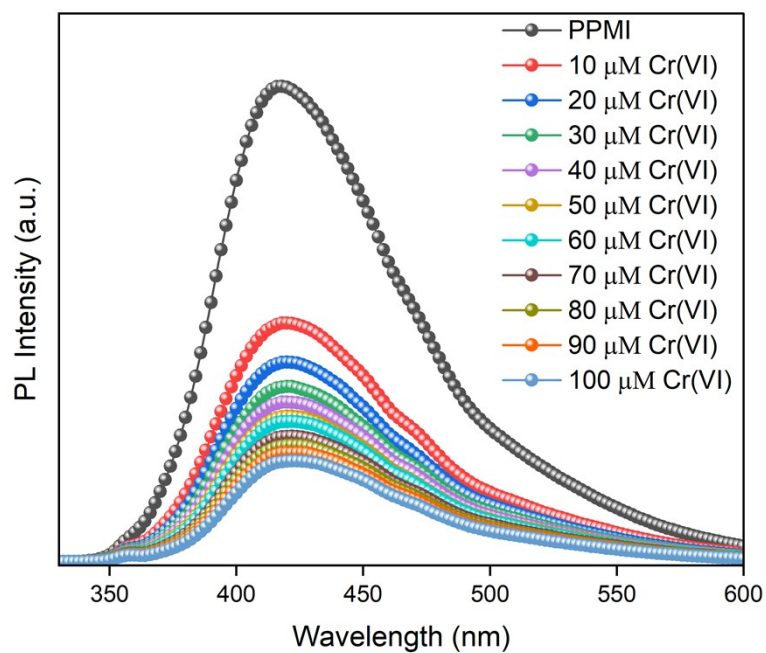

**Fig. S10** Emission spectra of PPMI after the addition of different amounts of Cr(VI) in HEPES buffer (pH 7.2, 10 mM).

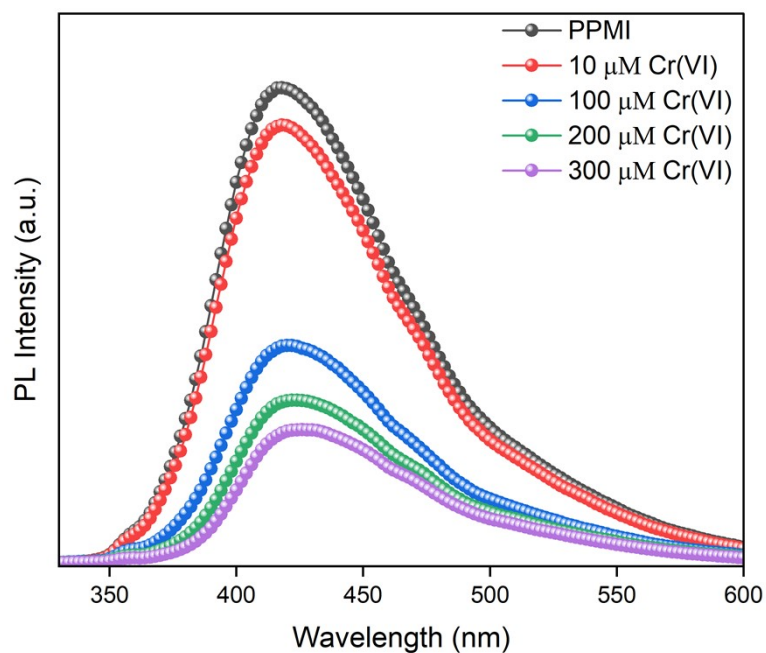

**Fig. S11** Emission spectra of PPMI after the addition of different amounts of Cr(VI) in PBS buffer (pH 7.2).

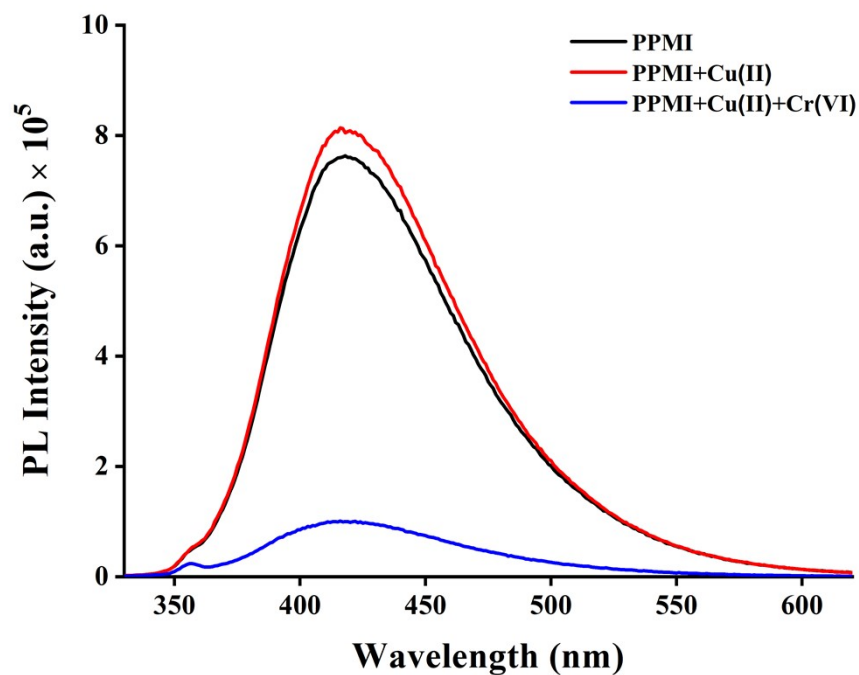

**Fig. S12** Emission spectra of PPMI (black), PPMI in presence of Cu(II) (10  $\mu$ M) (red), followed by addition of Cr(VI) (10  $\mu$ M) (blue).

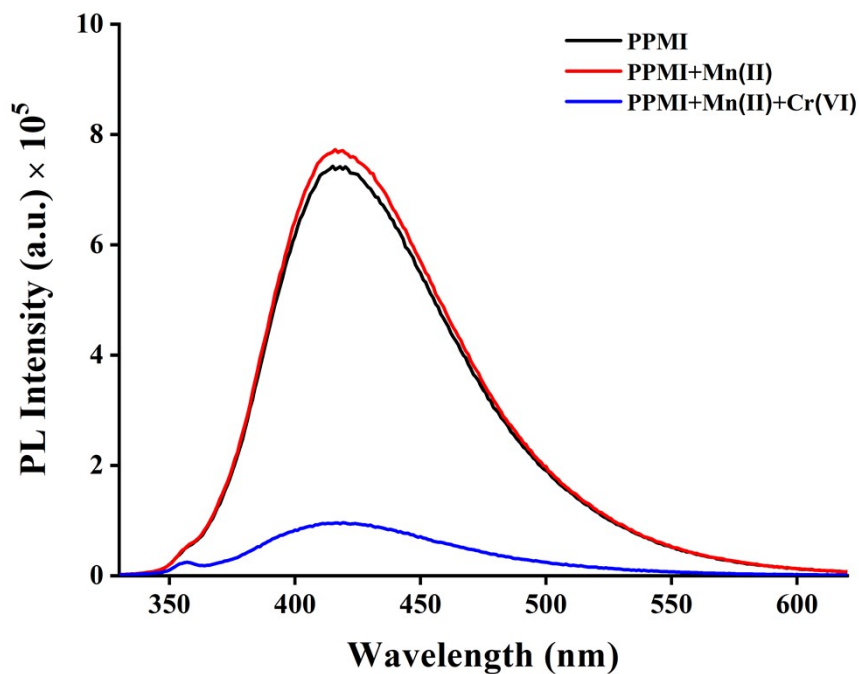

**Fig. S13** Emission spectra of PPMI (black), PPMI in presence of Mn(II) (10  $\mu$ M) (red), followed by addition of Cr(VI) (10  $\mu$ M) (blue).

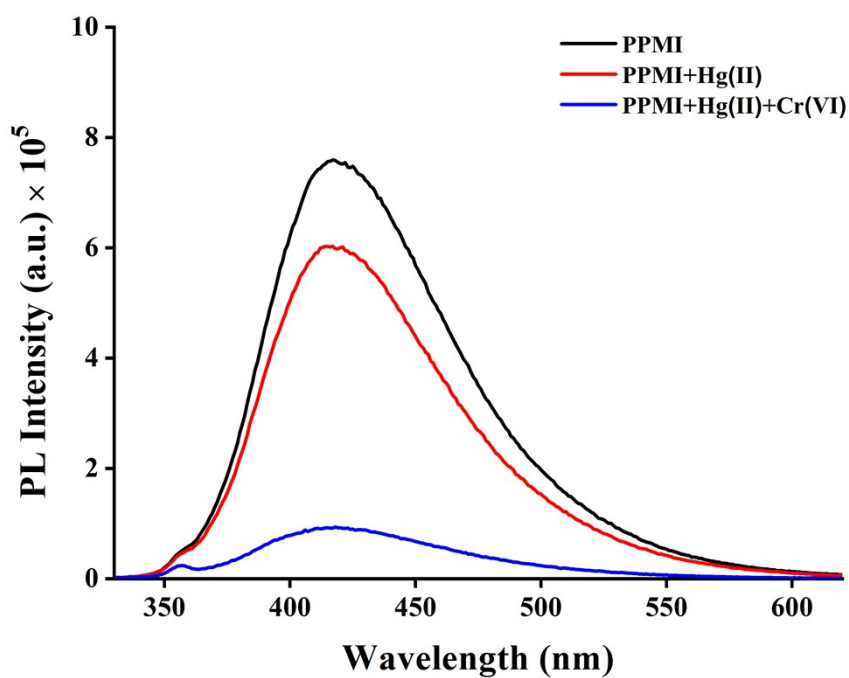

**Fig. S14** Emission spectra of PPMI (black), PPMI in presence of  $\text{Hg(II)}$  ( $10 \mu\text{M}$ ) (red), followed by addition of  $\text{Cr(VI)}$  ( $10 \mu\text{M}$ ) (blue).

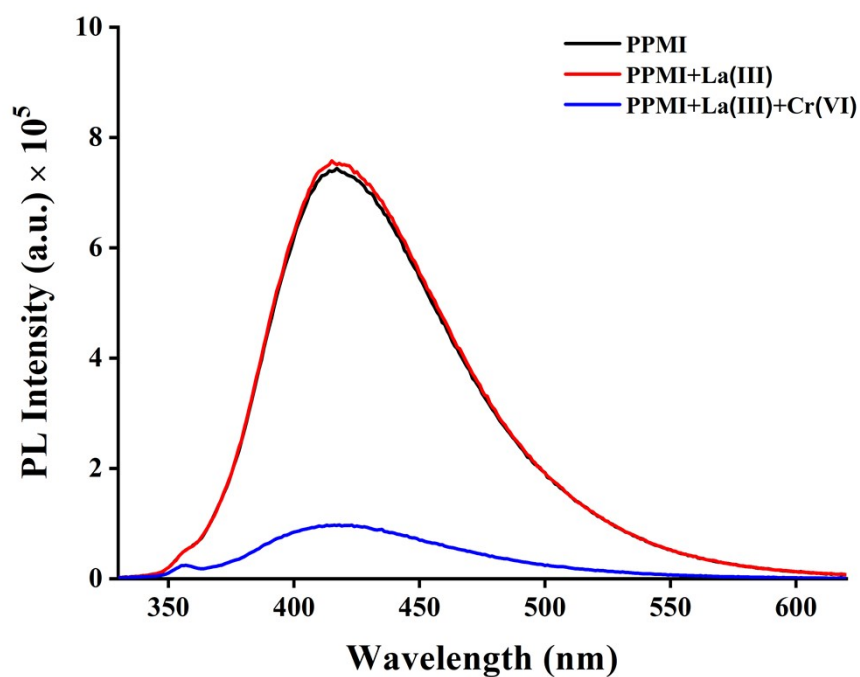

**Fig. S15** Emission spectra of PPMI (black), PPMI in presence of  $\text{La(III)}$  ( $10 \mu\text{M}$ ) (red), followed by addition of  $\text{Cr(VI)}$  ( $10 \mu\text{M}$ ) (blue).

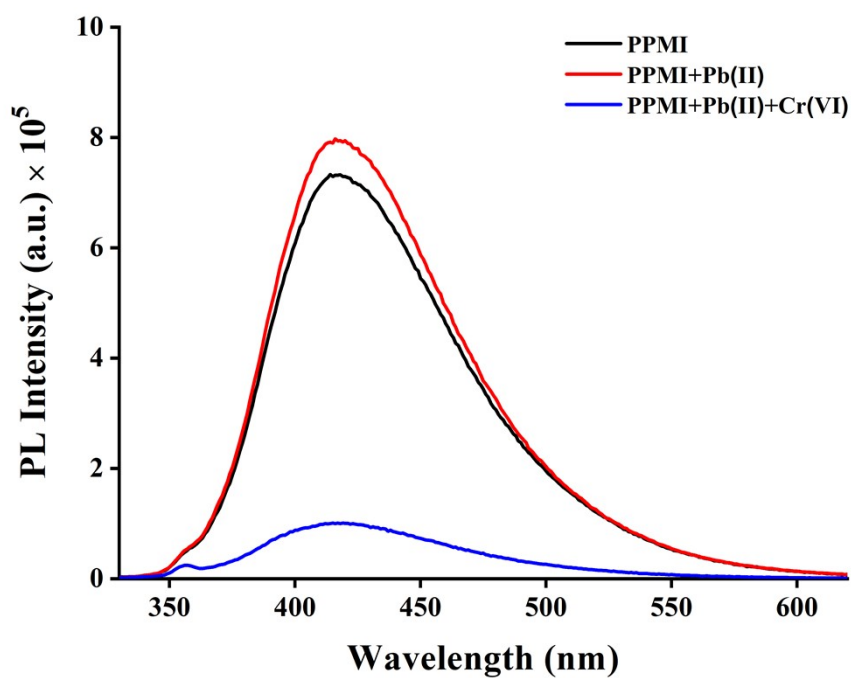

**Fig. S16** Emission spectra of PPMI (black), PPMI in presence of Pb(II) (10  $\mu$ M) (red), followed by addition of Cr(VI) (10  $\mu$ M) (blue).

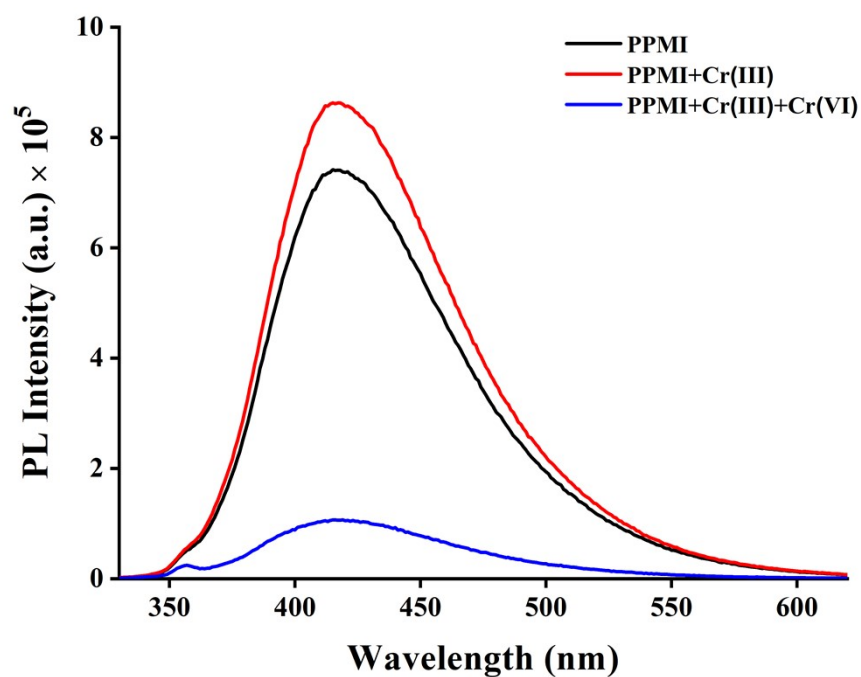

**Fig. S17** Emission spectra of PPMI (black), PPMI in presence of Cr(III) (10  $\mu$ M) (red), followed by addition of Cr(VI) (10  $\mu$ M) (blue).

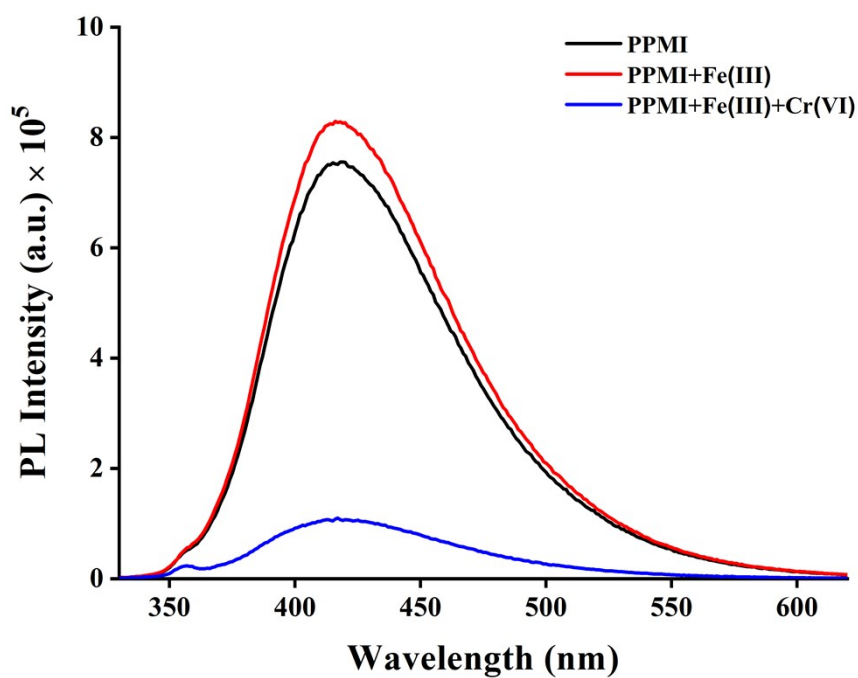

**Fig. S18** Emission spectra of PPMI (black), PPMI in presence of Fe(III) (10  $\mu$ M) (red), followed by addition of Cr(VI) (10  $\mu$ M) (blue).

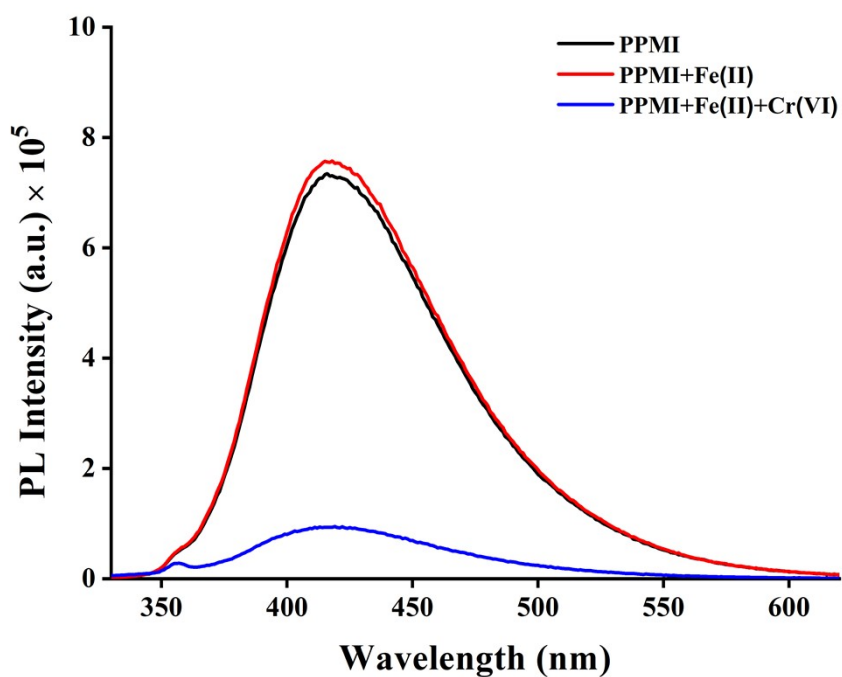

**Fig. S19** Emission spectra of PPMI (black), PPMI in presence of Fe(II) (10  $\mu$ M) (red), followed by addition of Cr(VI) (10  $\mu$ M) (blue).

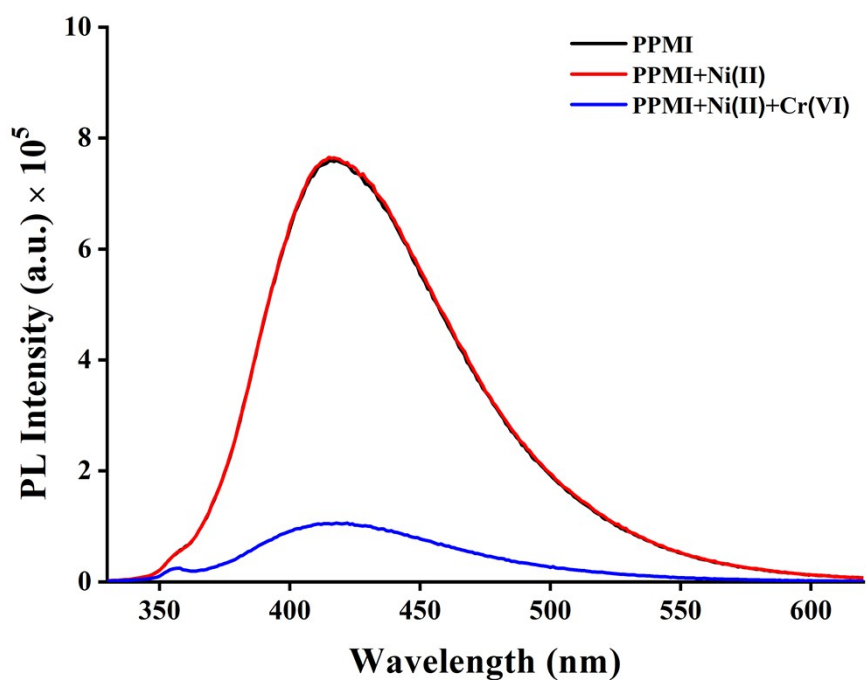

**Fig. S20** Emission spectra of PPMI (black), PPMI in presence of Ni(II) (10  $\mu$ M) (red), followed by addition of Cr(VI) (10  $\mu$ M) (blue).

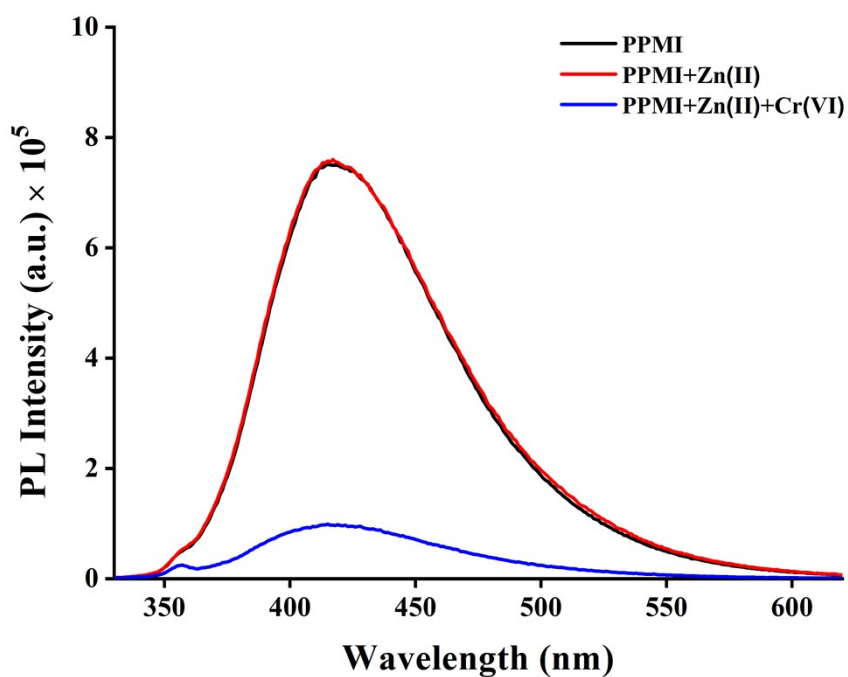

**Fig. S21** Emission spectra of PPMI (black), PPMI in presence of Zn(II) (10  $\mu$ M) (red), followed by addition of Cr(VI) (10  $\mu$ M) (blue).

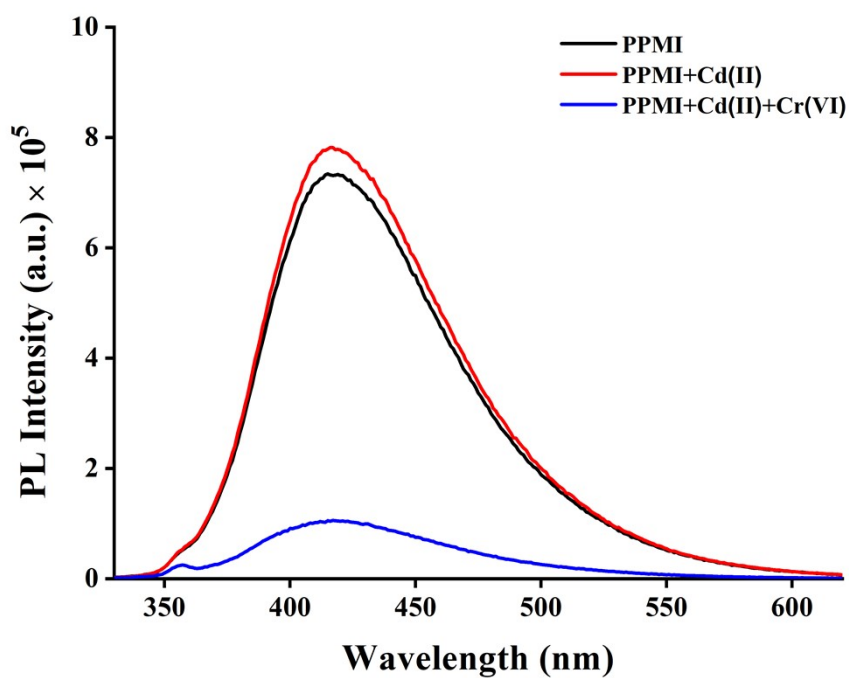

**Fig. S22** Emission spectra of PPMI (black), PPMI in presence of Cd(II) (10  $\mu$ M) (red), followed by addition of Cr(VI) (10  $\mu$ M) (blue).

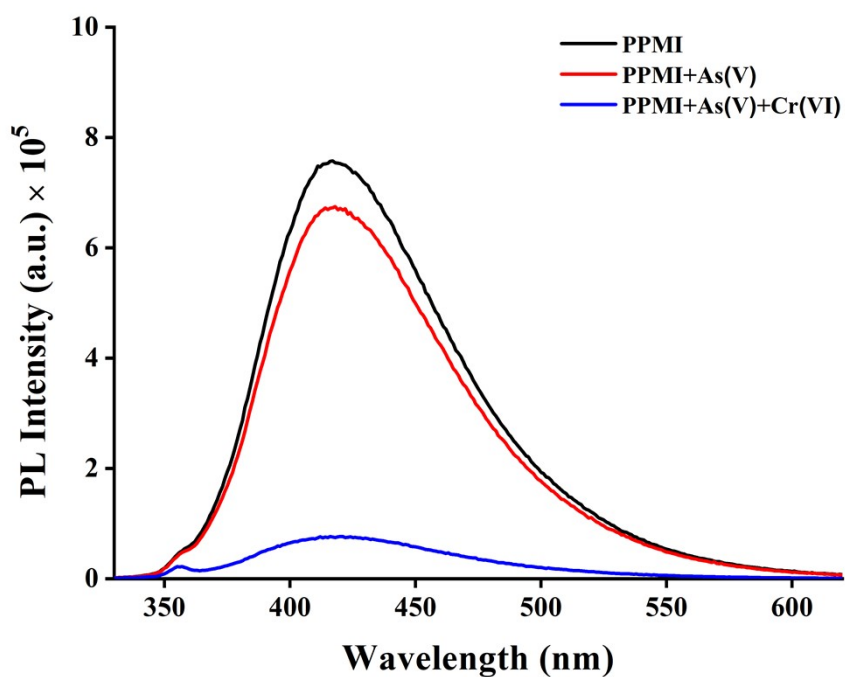

**Fig. S23** Emission spectra of PPMI (black), PPMI in presence of As(V) (10  $\mu$ M) (red), followed by addition of Cr(VI) (10  $\mu$ M) (blue).

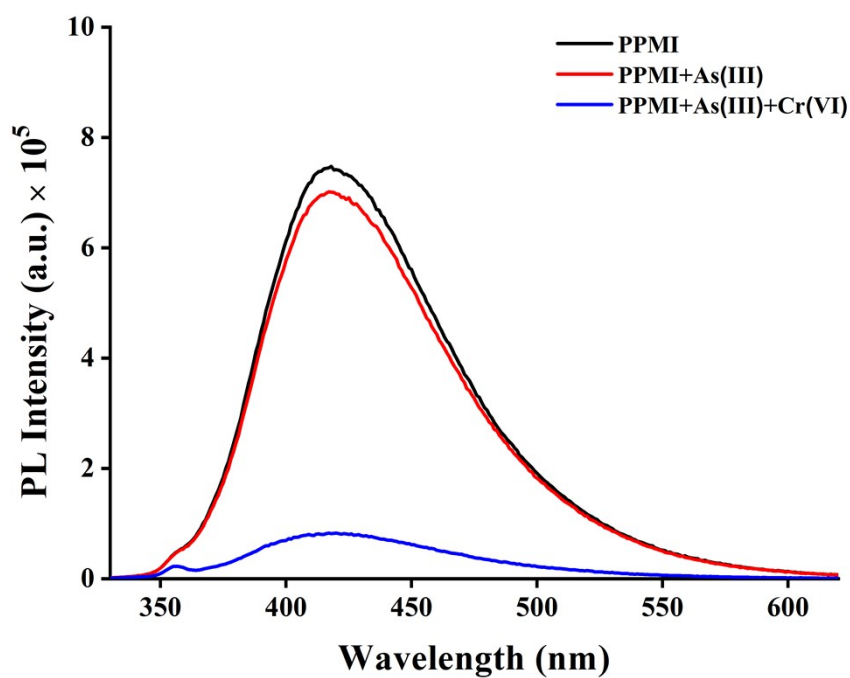

**Fig. S24** Emission spectra of PPMI (black), PPMI in presence of As(III) (10  $\mu$ M) (red), followed by addition of Cr(VI) (10  $\mu$ M) (blue).

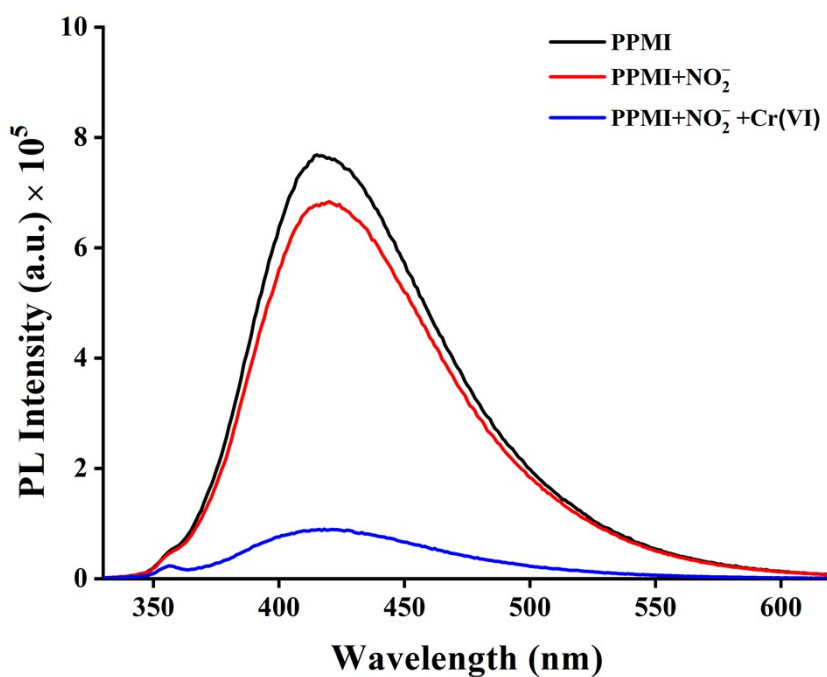

**Fig. S25** Emission spectra of PPMI (black), PPMI in presence of NO<sub>2</sub><sup>-</sup> (10  $\mu$ M) (red), followed by addition of Cr(VI) (10  $\mu$ M) (blue).



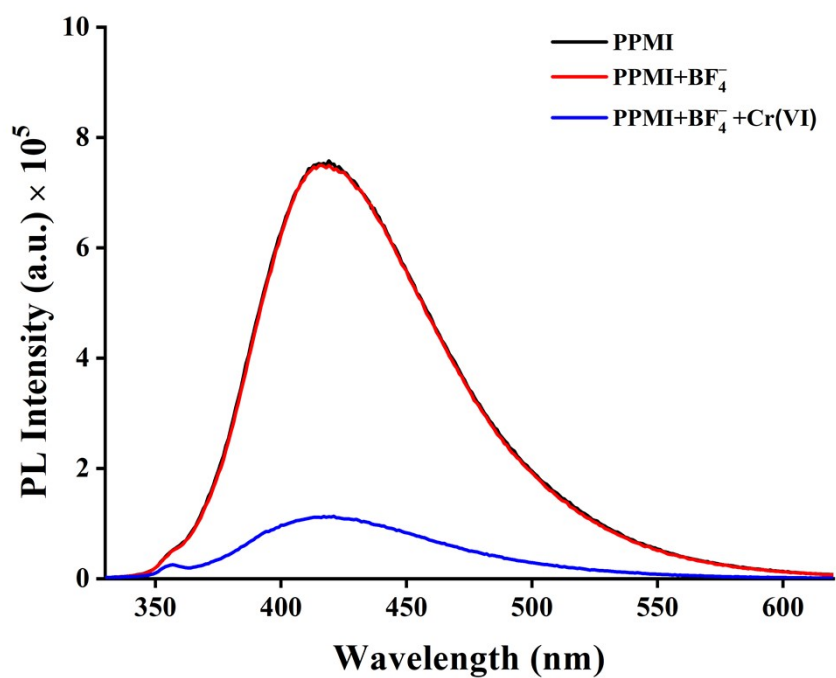

**Fig. S26** Emission spectra of PPMI (black), PPMI in presence of BF<sub>4</sub><sup>-</sup> (10 μM) (red), followed by addition of Cr(VI) (10 μM) (blue).

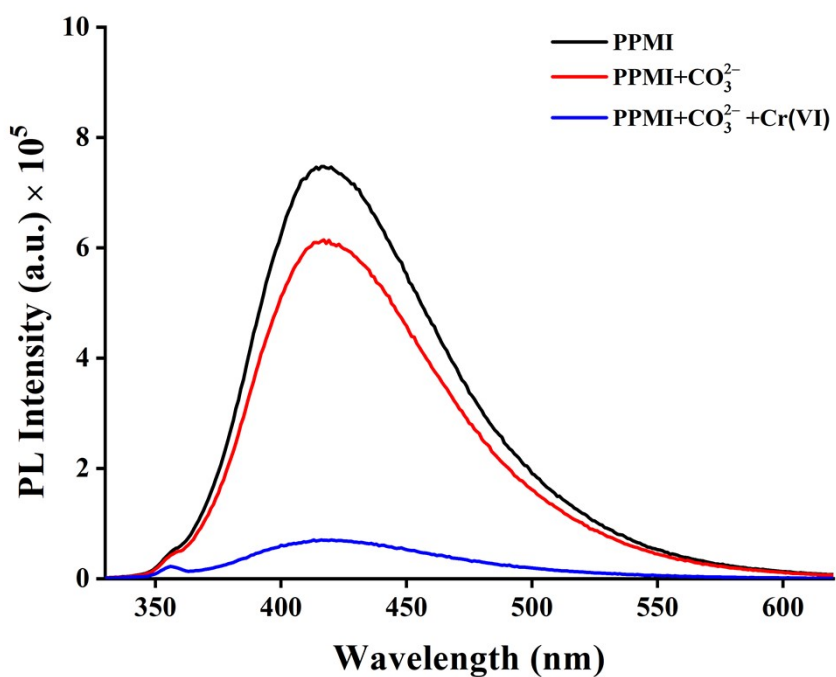

**Fig. S27** Emission spectra of PPMI (black), PPMI in presence of CO<sub>3</sub><sup>2-</sup> (10 μM) (red), followed by addition of Cr(VI) (10 μM) (blue).

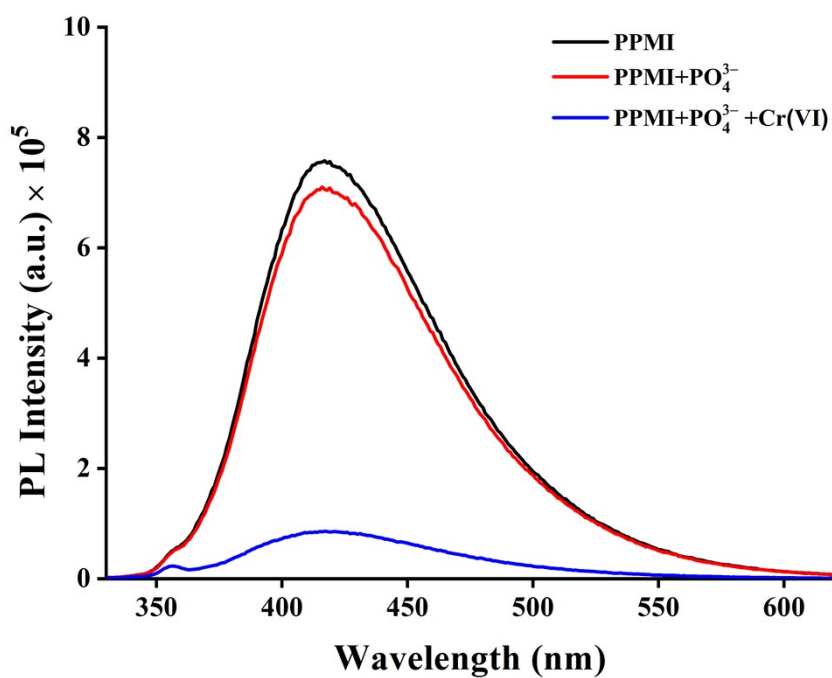

**Fig. S28** Emission spectra of PPMI (black), PPMI in presence of PO<sub>4</sub><sup>3-</sup> (10 μM) (red), followed by addition of Cr(VI) (10 μM) (blue).

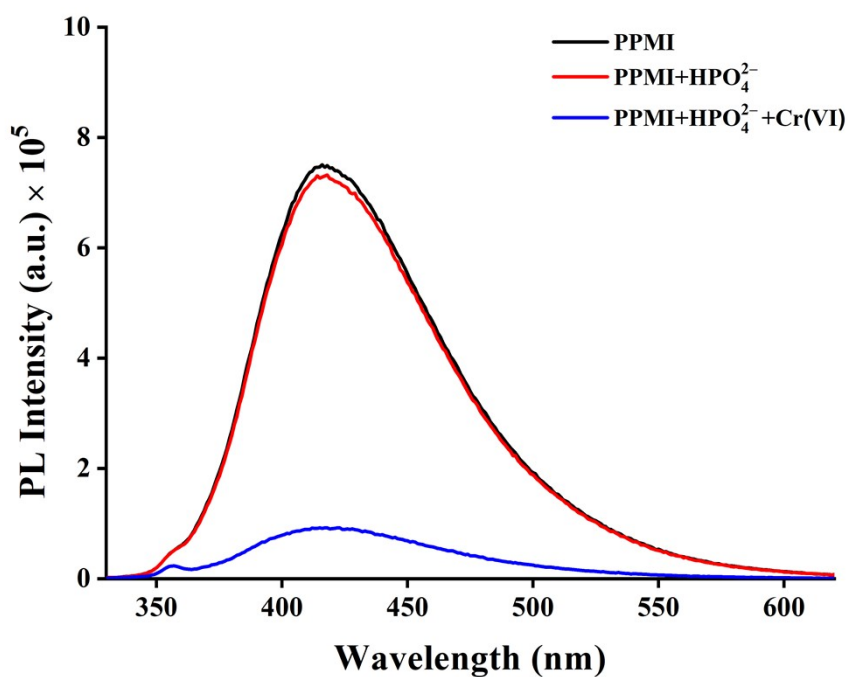

**Fig. S29** Emission spectra of PPMI (black), PPMI in presence of HPO<sub>4</sub><sup>2-</sup> (10 μM) (red), followed by addition of Cr(VI) (10 μM) (blue).

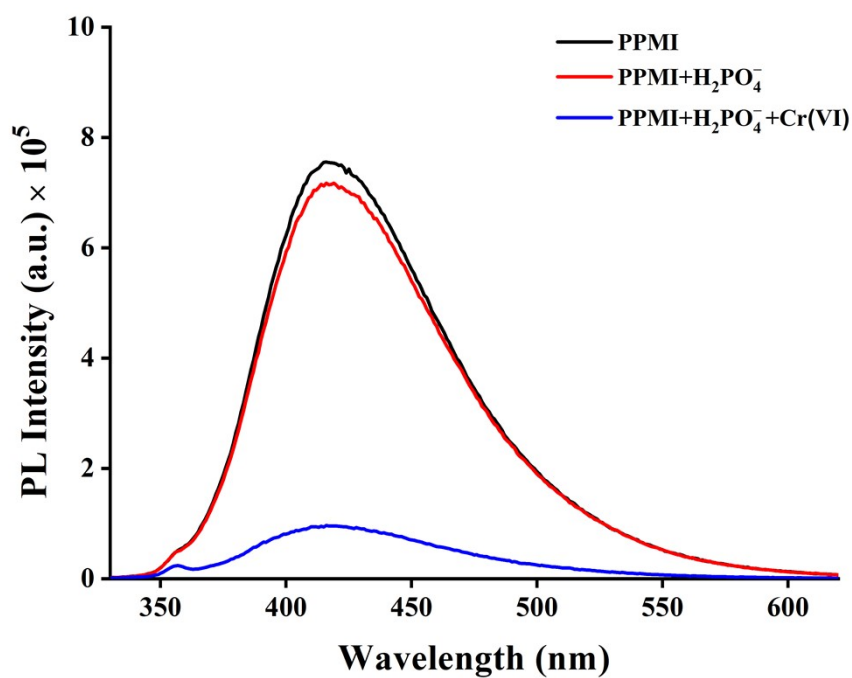

**Fig. S30** Emission spectra of PPMI (black), PPMI in presence of  $\text{H}_2\text{PO}_4^-$  (10  $\mu\text{M}$ ) (red), followed by addition of  $\text{Cr(VI)}$  (10  $\mu\text{M}$ ) (blue).

**Table S3.** Calculations for IFE corrections for quenching of PPMI by  $\text{Cr(VI)}$ .

| Cr(VI)<br>( $\mu\text{M}$ ) | $A_{\text{ex}}$ | $A_{\text{em}}$ | $I_{\text{obs}}$ | $I_{\text{corr}}$ | $I_{\text{corr}} / I_{\text{obs}}$<br>Correction factor<br>(CF) | $E_{\text{obs}}$ | $E_{\text{corr}}$ |
|-----------------------------|-----------------|-----------------|------------------|-------------------|-----------------------------------------------------------------|------------------|-------------------|
| 0                           | 0.110057        | 0.008537        | 737813.1751      | 845752.7257       | 1.146296589                                                     | 0                | 0                 |
| 1                           | 0.112169        | 0.010511        | 348499.2005      | 401367.1144       | 1.151701679                                                     | 52.76593         | 52.54321          |
| 2                           | 0.114876        | 0.013311        | 239672.1064      | 277786.4084       | 1.159026858                                                     | 67.51588         | 67.15513          |
| 3                           | 0.117624        | 0.015311        | 199720.9991      | 232750.8255       | 1.165379838                                                     | 72.93068         | 72.48004          |
| 4                           | 0.117805        | 0.015336        | 158308.7156      | 184533.5452       | 1.165656259                                                     | 78.54352         | 78.18115          |
| 5                           | 0.119372        | 0.015156        | 136513.9897      | 159382.6926       | 1.167519116                                                     | 81.49749         | 81.15493          |
| 6                           | 0.120572        | 0.015622        | 123761.5528      | 144771.3918       | 1.169760629                                                     | 83.2259          | 82.88254          |
| 7                           | 0.120755        | 0.01497         | 107523.0151      | 125708.2945       | 1.16912918                                                      | 85.4268          | 85.13652          |
| 8                           | 0.12165         | 0.015491        | 97319.72742      | 113964.9709       | 1.171036684                                                     | 86.80971         | 86.52502          |
| 9                           | 0.121675        | 0.015306        | 91008.45298      | 106554.6071       | 1.170820991                                                     | 87.66511         | 87.40121          |
| 10                          | 0.123496        | 0.015998        | 82843.89113      | 97276.39986       | 1.174213313                                                     | 88.7717          | 88.49825          |

## References:

1. M. A. S. Salem, A. M. Khan, Y. K. Manea, H. A. M. Saleh and M. Ahmad, *ACS Omega*, 2023, **8**, 1220-1231.
2. S. Menon, S. P. Usha, H. Manoharan, P. V. N. Kishore and V. V. R. Sai, *ACS Sens.*, 2023, **8**, 684-693.
3. X. Jiang, C. Tang, Z. Zhao, Y. Liao, J. Zhao, J. Hu, H. Zhang, Q. Yu, P.-L. Tremblay and T. Zhang, *ACS Sustainable Chem. Eng.*, 2023, **11**, 6610-6618.
4. M. Feng, X. Chen, Y. Liu, Y. Zhao, P. G. Karmaker, J. Liu, Y. Wang and X. Yang, *J. Mater. Chem. B*, 2023, **11**, 4020-4027.
5. M. Liu, S. Zhang, Y. Wang, J. Liu, W. Hu and X. Lu, *Anal. Chem.*, 2022, **94**, 1669-1677.
6. Y. Zhang, Y. Liu, F. Huo, B. Zhang, W. Su and X. Yang, *ACS Appl. Nano Mater.*, 2022, **5**, 9223-9229.
7. S. Bhatt, G. Vyas and P. Paul, *ACS Omega*, 2022, **7**, 1318-1328.
8. S. C. Pal, D. Mukherjee and M. C. Das, *Inorg. Chem.*, 2022, **61**, 12396-12405.
9. F. Li, G. Zhang, L. Zou, X. Zhang, F. Liu, H. Li, J. Xu and X. Duan, *ACS Appl. Polym. Mater.*, 2022, **4**, 815-821.
10. P. Ravichandiran, D. S. Prabakaran, N. Maroli, A. R. Kim, B.-H. Park, M.-K. Han, T. Ramesh, S. Ponpandian and D. J. Yoo, *J. Hazard. Mater.*, 2021, **419**, 126409.
11. L. Qiu, Z. Ma, P. Li, X. Hu, C. Chen, X. Zhu, M. Liu, Y. Zhang, H. Li and S. Yao, *J. Hazard. Mater.*, 2021, **419**, 126443.
12. W. Shi, M. He, W. Li, X. Wei, B. Bui, M. Chen and W. Chen, *ACS Appl. Nano Mater.*, 2021, **4**, 802-810.
13. S. Roy, S. Bardhan, D. Mondal, I. Saha, J. Roy, S. Das, D. K. Chanda, P. Karmakar and S. Das, *Sens. Actuators B Chem.*, 2021, **348**, 130662.
14. S. Roy, S. Bardhan, D. K. Chanda, J. Roy, D. Mondal and S. Das, *ACS Appl. Mater. Interfaces*, 2020, **12**, 43833-43843.
15. J. Sun, P. Guo, M. Liu and H. Li, *J. Mater. Chem. C*, 2019, **7**, 8992-8999.
16. Y. B. Yin, C. L. Conrad, K. N. Heck, F. Lejarza and M. S. Wong, *ACS Appl. Mater. Interfaces*, 2019, **11**, 17491-17500.
17. P. Li, X.-M. Yin, L.-L. Gao, S.-L. Yang, Q. Sui, T. Gong and E.-Q. Gao, *ACS Appl. Nano Mater.*, 2019, **2**, 4646-4654.
18. J. Song, H. Zhou, R. Gao, Y. Zhang, H. Zhang, Y. Zhang, G. Wang, P. K. Wong and H. Zhao, *ACS Sens.*, 2018, **3**, 792-798.
19. X. Shen, X. Yang, C. Su, J. Yang, L. Zhang, B. Liu, S. Gao, F. Gai, Z. Shao and G. Gao, *J. Mater. Chem. C*, 2018, **6**, 2088-2094.
20. B.-B. Lu, W. Jiang, J. Yang, Y.-Y. Liu and J.-F. Ma, *ACS Appl. Mater. Interfaces*, 2017, **9**, 39441-39449.
21. X.-Y. Guo, F. Zhao, J.-J. Liu, Z.-L. Liu and Y.-Q. Wang, *J. Mater. Chem. A*, 2017, **5**, 20035-20043.
